# Supplementary material for: Photochemical reactions of triplet phenylphosphinidene with carbon monoxide and nitric oxide
Source: Royal Society of Chemistry journal article supplement (doi:10.1039/c8cc08664h), 2018-01-01
Supplement: c8cc08664h1.pdf [file c8cc08664h1.pdf]

## Photochemical Reactions of Triplet Phenylphosphinidene with Carbon Monoxide and Nitric Oxide

Artur Mardyukov,\* and Dominik Niedek

### Table of Contents

|                                                   |    |
|---------------------------------------------------|----|
| Synthesis of 1-Phenylphosphirane 3 .....          | 2  |
| Matrix Apparatus Design.....                      | 5  |
| Computations.....                                 | 5  |
| Figure S1.....                                    | 5  |
| Figure S2.....                                    | 6  |
| Figure S3.....                                    | 6  |
| Scheme S1 .....                                   | 6  |
| Table S1.....                                     | 8  |
| Table S2.....                                     | 9  |
| References.....                                   | 9  |
| Geometric Structures and Electronic energies..... | 10 |



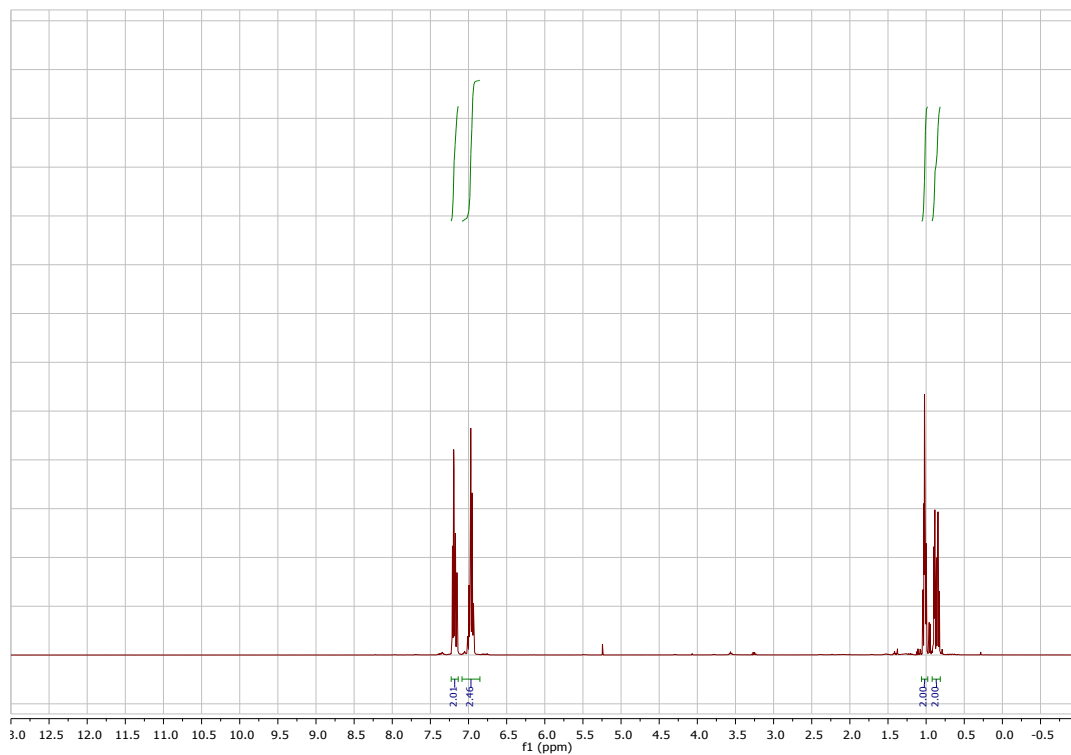

$^1\text{H}$  NMR spectrum of 3 in benzene- $\text{d}_6$ .

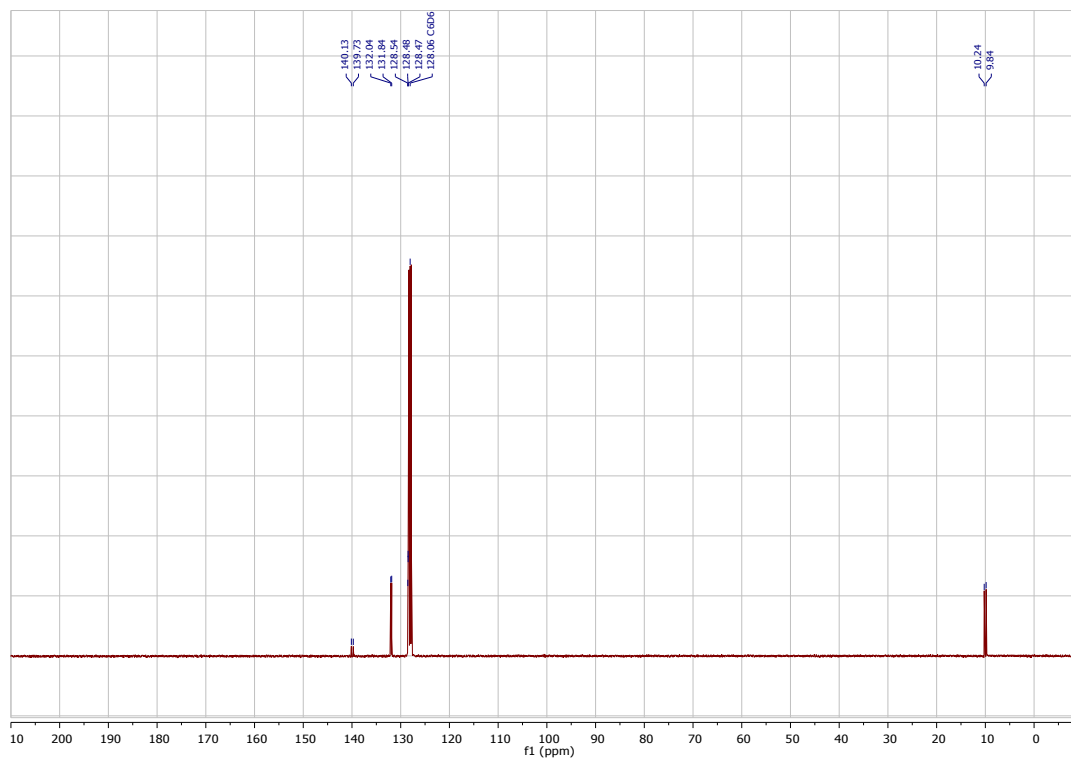

$^{13}\text{C}$  NMR spectrum of 3 in benzene- $\text{d}_6$ .

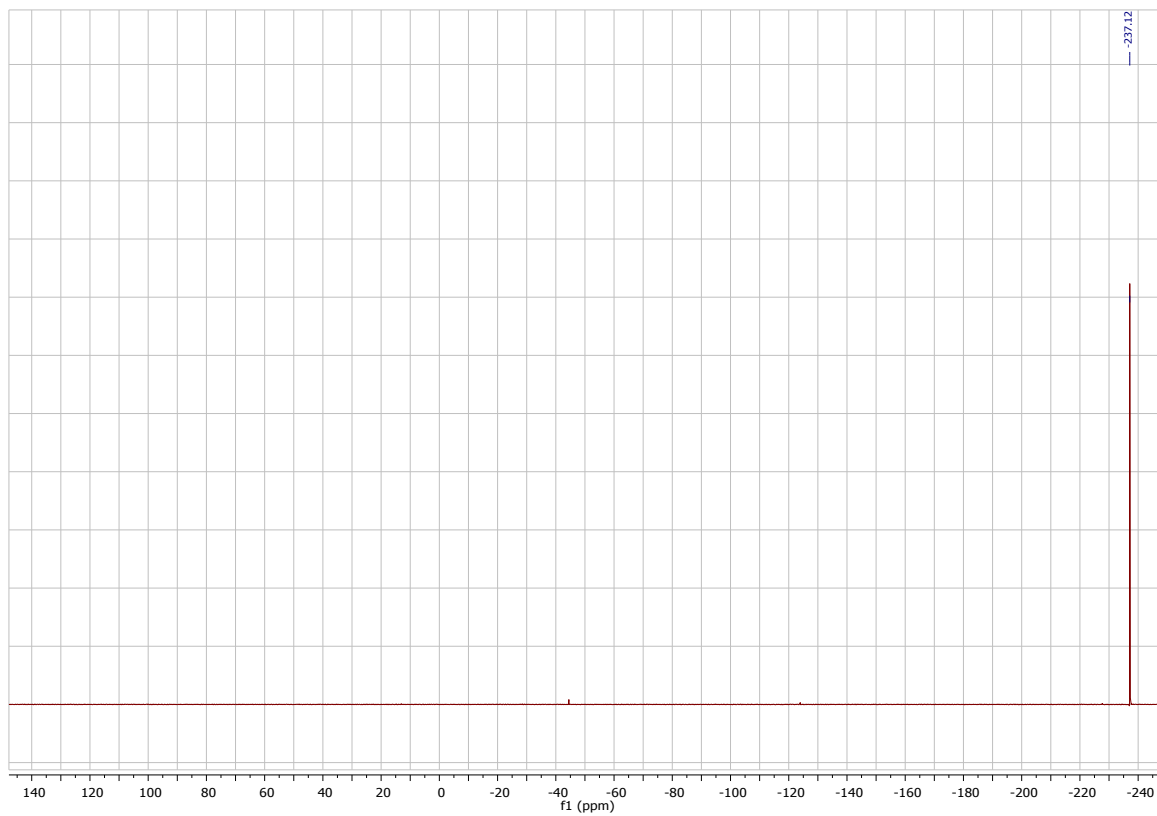

$^{31}\text{P}$  NMR spectrum of 3 in benzene- $\text{d}_6$ .

**Matrix Apparatus Design.** For the matrix isolation studies, we used an APD Cryogenics HC-2 cryostat with a closed-cycle refrigerator system, equipped with an inner CsI window for IR measurements. Spectra were recorded with a Bruker IFS 55 FT-IR spectrometer with a spectral range of 4500–400  $\text{cm}^{-1}$  and a resolution of 0.7  $\text{cm}^{-1}$  and UV/Vis spectra were recorded with a JASCO V-670 spectrophotometer. Matrices were generated by co-deposition of **3** (evaporated at 0 °C from a storage bulb) with a large excess of argon (typically 60–120 mbar from a 2000 mL storage bulb) on the surface of the matrix window at 10 K (20 K). A high-pressure mercury lamp (HBO 200, Osram) with a monochromator (Bausch & Lomb) was used for irradiation.

**Computations.** All geometries were optimized and characterized as minima or transition structures by means of analytical harmonic vibrational frequency computations at the M06-2X/6-311++G(2d,2p) level of theory.<sup>1-4</sup> All computations were performed with the Gaussian09 program.<sup>5</sup>

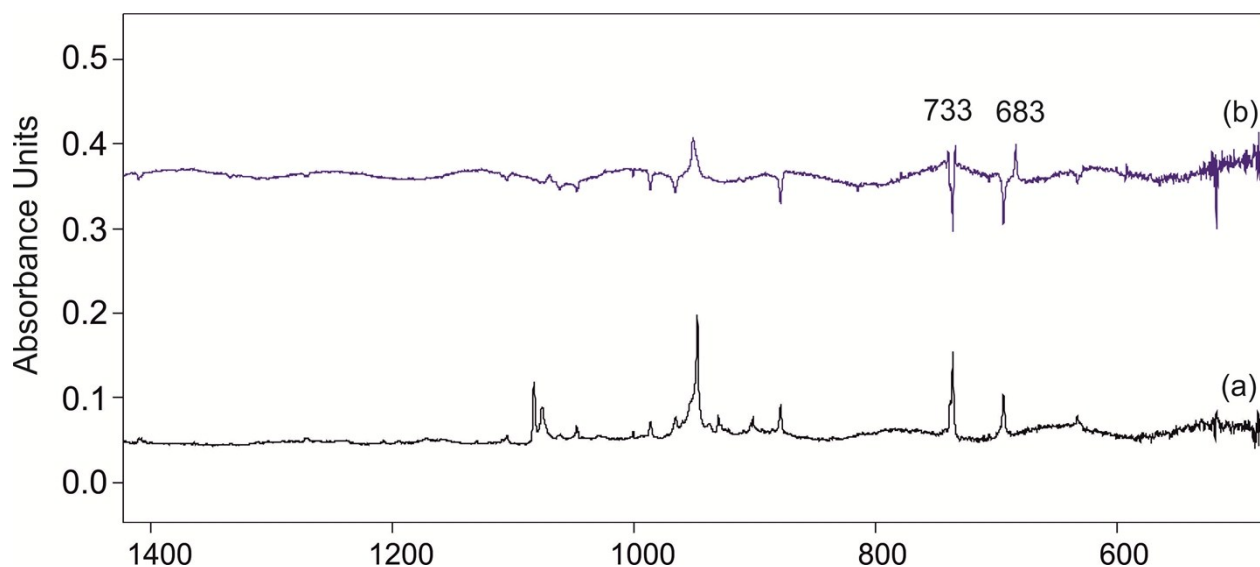

**Figure S1.** (a) IR spectrum of matrix isolated **3** in Ar at 10 K. (b) IR difference spectra showing the photochemistry of **1** after irradiation at  $\lambda=334$  nm in argon at 10 K. (b) IR difference spectra showing the photochemistry of **3** after irradiation at  $\lambda = 254$  nm in argon at 10 K. Downward bands assigned to **3** disappear while upward bands assigned to **3**<sup>2</sup> appear after 15 min irradiation time.

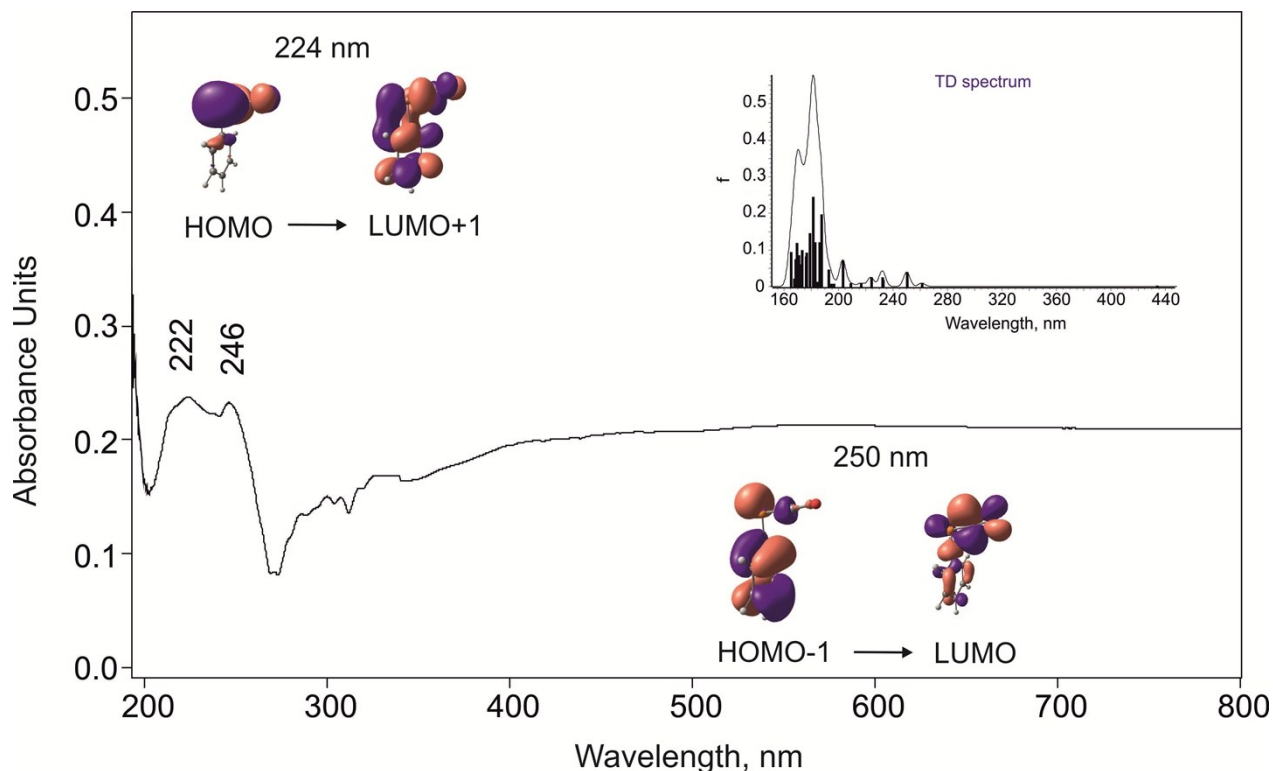

**Figure S2.** UV/vis difference spectrum of **1** at 10 K; the photochemistry of **3** in the presence of 2% CO after irradiation at  $\lambda = 254$  nm in argon at 10 K. Inset: Computed [TD-M06-2X/6-311++G(2d,2p)] spectrum of **1**. Inset: the NBOs for the two electronic transitions computed at TD-M06-2X/6-311++G(2d,2p). HOMO = highest occupied molecular orbital; LUMO = lowest unoccupied molecular orbital.

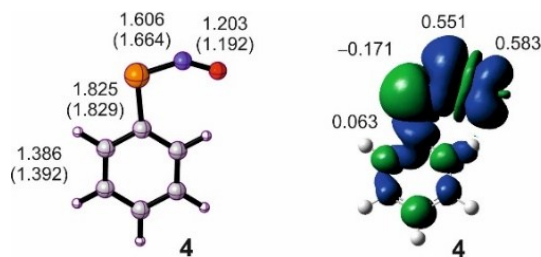

**Figure S3.** Selected bond lengths (Å) of **4** at the UM06-2X/6-311++G(2d,2p) level. The values in parentheses at UMP2/cc-pVTZ. Computed spin density of **4** at the UM06-2X/6-311++G(2d,2p) level.

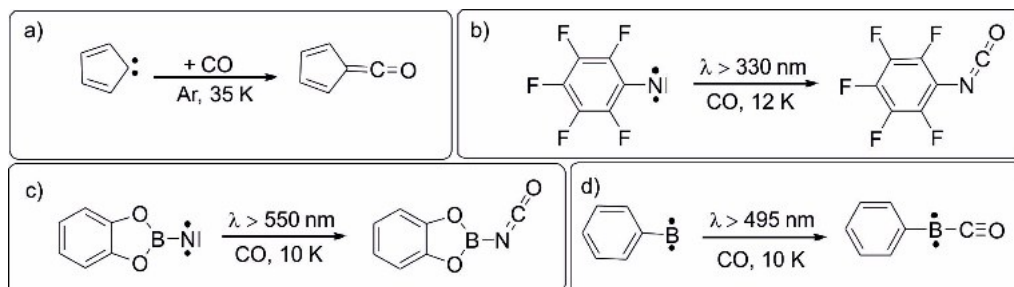

**Scheme S1.** Reactions of carbene, nitrenes, and borylene with CO.



**Table S1.** Experimental (Ar matrix, 10 K) and computed IR frequencies of **1** and <sup>13</sup>CO-**1**, band origins in cm<sup>-1</sup>, computed intensities (km mol<sup>-1</sup>) in parentheses.

| Mode | <b>1</b>                             |                            | <b>1</b><br>Ar, 10 K <sup>c</sup> | <sup>13</sup> CO- <b>1</b>           |                            | <sup>13</sup> CO- <b>1</b><br>Ar, 10 K <sup>c</sup> | Assignment      |
|------|--------------------------------------|----------------------------|-----------------------------------|--------------------------------------|----------------------------|-----------------------------------------------------|-----------------|
|      | M06-2X/6-311++G(2d, 2p) <sup>a</sup> | B3LYP/cc-pVTZ <sup>b</sup> |                                   | M06-2X/6-311++G(2d, 2p) <sup>a</sup> | B3LYP/cc-pVTZ <sup>b</sup> |                                                     |                 |
| 31   | 2104 (898)                           | 2052 (765)                 | 1978 (s)                          | 2054 (850)                           | 2002 (725)                 | 1932 (s)                                            | C=O str.        |
| 28   | 1524 (10.3)                          | 1514 (12.5)                | 1482 (w)                          | 1524 (10.4)                          | 1514 (12.6)                | 1482 (w)                                            | CH def.         |
| 27   | 1481 (9.8)                           | 1471 (8.9)                 | 1438 (w)                          | 1481 (9.9)                           | 1471 (8.9)                 | 1438 (w)                                            | CH def.         |
| 26   | 1351 (3)                             | 1353 (2.8)                 | -                                 | 1351 (3)                             | 1353 (2.8)                 | -                                                   | CH def.         |
| 21   | 1105 (4)                             | 1094 (1.5)                 | -                                 | 1105 (3.6)                           | 1094 (1.5)                 | -                                                   | CH def.         |
| 20   | 1055 (3.6)                           | 1045 (6.7)                 | 1027 (w)                          | 1055 (3.6)                           | 1045 (6.7)                 | -                                                   | ring distortion |
| 18   | 1021 (5.5)                           | 1020 (3.4)                 | 998 (w)                           | 1021 (5.5)                           | 1020 (3.3)                 | -                                                   | ring distortion |
| 14   | 777 (32.2)                           | 766 (33.5)                 | 746 (m)                           | 776 (32.8)                           | 765 (34.2)                 | 746 (m)                                             | CH o.o.p. def.  |
| 13   | 721 (39.7)                           | 716 (22.7)                 | 689 (m)                           | 721 (39.5)                           | 716 (33.4)                 | 689 (m)                                             | CH o.o.p. def.  |
| 12   | 715 (2)                              | 714 (13.7)                 | -                                 | 705 (2)                              | 710 (2.7)                  | -                                                   | P-C str.        |
| 9    | 561 (15.3)                           | 558 (11)                   | -                                 | 549 (16.6)                           | 546 (11.4)                 | -                                                   | PCO def.        |

<sup>a</sup>M06-2X/6-311++G(2d,2p), harmonic approximation, unscaled frequencies, intensities (in parentheses) in km mol<sup>-1</sup>. <sup>b</sup>B3LYP/cc-pVTZ, harmonic approximation, unscaled frequencies, intensities (in parentheses) in km mol<sup>-1</sup>. <sup>c</sup>Experiment: argon matrix, 10 K.; approximate relative intensities (w: weak, m: moderate, s: strong).



**Table S2.** Experimental (Ar matrix, 10 K) and computed IR frequencies of **4** and <sup>15</sup>NO-**4**, band origins in cm<sup>-1</sup>, computed intensities (km mol<sup>-1</sup>) in parentheses.

| Mode | <b>4</b>                             |                            | <b>4</b><br>Ar, 10 K <sup>c</sup> | <sup>15</sup> NO- <b>4</b>           |                            | <sup>15</sup> NO- <b>4</b><br>Ar, 10 K <sup>c</sup> | Assignment      |
|------|--------------------------------------|----------------------------|-----------------------------------|--------------------------------------|----------------------------|-----------------------------------------------------|-----------------|
|      | M06-2X/6-311++G(2d, 2p) <sup>a</sup> | B3LYP/cc-pVTZ <sup>b</sup> |                                   | M06-2X/6-311++G(2d, 2p) <sup>a</sup> | B3LYP/cc-pVTZ <sup>b</sup> |                                                     |                 |
| 29   | 1613 (493)                           | 1580 (411)                 | 1545 (s)                          | 1582 (481)                           | 1549 (395)                 | 1513 (s)                                            | N=O str.        |
| 28   | 1527 (2.6)                           | 1517 (3.1)                 | 1439 (m)                          | 1527 (3.3)                           | 1516 (5.5)                 | 1439 (m)                                            | CH def.         |
| 27   | 1480 (15.2)                          | 1470 (14.4)                | 1438 (w)                          | 1480 (15.1)                          | 1470 (14.4)                | 1438 (w)                                            | CH def.         |
| 26   | 1363 (8.8)                           | 1365 (8.2)                 | -                                 | 1363 (9.2)                           | 1365 (8.6)                 | -                                                   | CH def.         |
| 22   | 1118 (8.8)                           | 1107 (4.8)                 | -                                 | 1118 (8.8)                           | 1107 (4.9)                 | -                                                   | ring distortion |
| 21   | 1112 (8.8)                           | 1094 (8.6)                 | 1099 (m)                          | 1112 (8.9)                           | 1094 (8.7)                 | 1099 (m)                                            | ring distortion |
| 18   | 1019 (1.9)                           | 1016 (2.3)                 | 998 (w)                           | 1019 (1.9)                           | 1016 (2.3)                 | -                                                   | ring distortion |
| 14   | 763 (45)                             | 758 (40.3)                 | 744 (m)                           | 763 (45)                             | 758 (40.3)                 | 744 (m)                                             | CH o.o.p. def.  |
| 12   | 712 (37.3)                           | 710 (32.5)                 | 689 (m)                           | 712 (37.2)                           | 710 (32.5)                 | 689 (m)                                             | CH o.o.p. def.  |
| 11   | 706 (3.9)                            | 700 (2.3)                  | -                                 | 706 (3.9)                            | 700 (2.3)                  | -                                                   | P-C str.        |
| 9    | 485 (41.6)                           | 480 (36)                   | 463 (w)                           | 479 (41.2)                           | 473 (35.6)                 | 461 (w)                                             | PNO def.        |
| 8    | 473 (8.2)                            | 471 (6.3)                  | -                                 | 472 (7.9)                            | 470 (6.1)                  | -                                                   | ring breathing  |

<sup>a</sup>M06-2X/6-311++G(2d,2p), harmonic approximation, unscaled frequencies, intensities (in parentheses) in km mol<sup>-1</sup>. <sup>b</sup>B3LYP/cc-pVTZ, harmonic approximation, unscaled frequencies, intensities (in parentheses) in km mol<sup>-1</sup>. <sup>c</sup>Experiment: argon matrix, 10 K.; approximate relative intensities (w: weak, m: moderate, s: strong).

## References

1. Zhao, Y.; Truhlar, D. G. The M06 suite of density functionals for main group thermochemistry, thermochemical kinetics, noncovalent interactions, excited states, and transition elements: two new functionals and systematic testing of four M06-class functionals and 12 other functionals. *Theor. Chem. Acc.* **2008**, *120* (1), 215-241.
2. Becke, A. D. Density-functional exchange-energy approximation with correct asymptotic behavior. *Phys. Rev. A* **1988**, *38* (6), 3098-3100.
3. Lee, C.; Yang, W.; Parr, R. G. Development of the Colle-Salvetti correlation-energy formula into a functional of the electron density. *Phys. Rev. B* **1988**, *37* (2), 785-789.
4. Miehlich, B.; Savin, A.; Stoll, H.; Preuss, H. Results obtained with the correlation energy density functionals of Becke and Lee, Yang and Parr. *Chem. Phys. Lett.* **1989**, *157* (3), 200-206.
5. M. J. Frisch et al. Gaussian 09, D.01, . Wallingford CT, **2013**.

## Geometric Structures and Electronic energies

### 2: phenylphosphinidene - $C_{2v}$ point group

0 3

|    |             |              |              |
|----|-------------|--------------|--------------|
| 15 | 0.000000000 | 0.000000000  | 2.387950000  |
| 6  | 0.000000000 | 0.000000000  | 0.594275000  |
| 6  | 0.000000000 | 1.205451000  | -0.123883000 |
| 6  | 0.000000000 | -1.205451000 | -0.123883000 |
| 6  | 0.000000000 | 1.203503000  | -1.509051000 |
| 6  | 0.000000000 | -1.203503000 | -1.509051000 |
| 6  | 0.000000000 | 0.000000000  | -2.205634000 |
| 1  | 0.000000000 | 2.145464000  | 0.413215000  |
| 1  | 0.000000000 | -2.145464000 | 0.413215000  |
| 1  | 0.000000000 | 2.140792000  | -2.047886000 |
| 1  | 0.000000000 | -2.140792000 | -2.047886000 |
| 1  | 0.000000000 | 0.000000000  | -3.286540000 |

E[M062X] = -572.89398323

ZPVE[M062X] = 0.091058

### 3: Phenyldioxophosphorane - ( $C_{2v}$ point group)

0 1

|    |              |              |              |
|----|--------------|--------------|--------------|
| 15 | 0.611207000  | -1.715881000 | 0.000000000  |
| 6  | -0.956661000 | -2.360532000 | 0.747181000  |
| 6  | -0.956661000 | -2.360532000 | -0.747181000 |
| 6  | 0.297503000  | 0.098779000  | 0.000000000  |
| 6  | -0.956661000 | 0.709901000  | 0.000000000  |
| 6  | 1.431338000  | 0.910847000  | 0.000000000  |
| 6  | 1.319522000  | 2.295897000  | 0.000000000  |
| 6  | -1.071779000 | 2.091978000  | 0.000000000  |
| 6  | 0.066486000  | 2.890214000  | 0.000000000  |
| 1  | -1.577668000 | -1.641573000 | 1.261261000  |
| 1  | -1.577668000 | -1.641573000 | -1.261261000 |
| 1  | -0.869254000 | -3.313390000 | 1.248682000  |
| 1  | -0.869254000 | -3.313390000 | -1.248682000 |
| 1  | 2.413305000  | 0.453837000  | 0.000000000  |
| 1  | -1.859264000 | 0.112407000  | 0.000000000  |
| 1  | -2.052272000 | 2.548080000  | 0.000000000  |
| 1  | -0.025795000 | 3.967226000  | 0.000000000  |
| 1  | 2.211258000  | 2.907270000  | 0.000000000  |

E[M062X] = -651.54196666

ZPVE[M062X] = 0.147387

### 1: phenylphosphaketene -

0 1

|    |              |              |              |
|----|--------------|--------------|--------------|
| 15 | -1.648173000 | -0.660422000 | -0.847176000 |
| 6  | 0.090812000  | -0.241882000 | -0.330113000 |
| 6  | 0.667897000  | 0.980578000  | -0.669290000 |
| 6  | 0.858816000  | -1.201487000 | 0.326791000  |
| 6  | 1.990441000  | 1.245329000  | -0.339776000 |
| 6  | 2.184271000  | -0.937909000 | 0.646627000  |
| 6  | 2.750233000  | 0.286531000  | 0.317446000  |
| 1  | 0.080769000  | 1.723172000  | -1.191926000 |
| 1  | 0.417509000  | -2.152796000 | 0.590757000  |
| 1  | 2.427083000  | 2.199345000  | -0.600441000 |
| 1  | 2.771761000  | -1.688221000 | 1.157147000  |
| 1  | 3.780951000  | 0.492309000  | 0.569977000  |
| 6  | -2.294189000 | 0.260048000  | 0.412358000  |
| 8  | -2.780645000 | 0.873159000  | 1.249735000  |

E[M062X] = -686.2552587

ZPVE[M062X] = 0.1004224

0 1

|    |              |              |              |
|----|--------------|--------------|--------------|
| 15 | -1.633708000 | -0.912127000 | -0.624409000 |
| 6  | 0.089969000  | -0.325454000 | -0.252505000 |
| 6  | 0.551982000  | 0.932685000  | -0.657244000 |
| 6  | 0.971705000  | -1.210725000 | 0.378780000  |
| 6  | 1.870555000  | 1.307127000  | -0.409894000 |
| 6  | 2.294899000  | -0.837923000 | 0.606118000  |
| 6  | 2.745120000  | 0.422434000  | 0.218629000  |
| 1  | -0.118621000 | 1.611259000  | -1.167602000 |
| 1  | 0.619629000  | -2.183094000 | 0.696563000  |
| 1  | 2.215834000  | 2.285024000  | -0.717152000 |
| 1  | 2.969600000  | -1.529285000 | 1.092588000  |
| 1  | 3.770617000  | 0.712004000  | 0.401746000  |
| 6  | -2.285833000 | 0.317440000  | 0.329746000  |
| 8  | -2.797727000 | 1.144061000  | 0.972275000  |

E[MP2] = -683.687117

ZPVE[MP2] = 0.099585

#### 4: phosphinimine-N-oxyl radical

0 2

|    |              |              |              |
|----|--------------|--------------|--------------|
| 15 | 1.533549000  | -1.112456000 | -0.000009000 |
| 6  | -0.123076000 | -0.346279000 | 0.000002000  |
| 6  | -0.401984000 | 1.021349000  | 0.000000000  |
| 6  | -1.180089000 | -1.261208000 | 0.000013000  |
| 6  | -1.718306000 | 1.458485000  | 0.000008000  |
| 6  | -2.494294000 | -0.818670000 | 0.000021000  |
| 6  | -2.764451000 | 0.543295000  | 0.000019000  |
| 1  | 0.401672000  | 1.742968000  | -0.000009000 |
| 1  | -0.973761000 | -2.325152000 | 0.000014000  |
| 1  | -1.928322000 | 2.518879000  | 0.000007000  |
| 1  | -3.304051000 | -1.534636000 | 0.000029000  |
| 1  | -3.787643000 | 0.891872000  | 0.000026000  |
| 8  | 2.621105000  | 1.347319000  | -0.000022000 |
| 7  | 2.530461000  | 0.147504000  | -0.000019000 |

E[M062X] = -702.833538

ZPVE[M062X] = 0.0991585

0 2

|    |              |              |              |
|----|--------------|--------------|--------------|
| 15 | 1.520766000  | -1.153624000 | -0.000008000 |
| 6  | -0.127421000 | -0.358746000 | 0.000002000  |
| 6  | -0.384115000 | 1.018099000  | 0.000000000  |
| 6  | -1.200563000 | -1.264944000 | 0.000012000  |
| 6  | -1.702223000 | 1.474658000  | 0.000009000  |
| 6  | -2.513472000 | -0.800147000 | 0.000021000  |
| 6  | -2.765667000 | 0.572212000  | 0.000019000  |
| 1  | 0.434273000  | 1.723700000  | -0.000008000 |
| 1  | -1.008743000 | -2.331907000 | 0.000014000  |
| 1  | -1.896467000 | 2.538609000  | 0.000007000  |
| 1  | -3.334029000 | -1.504477000 | 0.000029000  |
| 1  | -3.784161000 | 0.935250000  | 0.000026000  |
| 8  | 2.659377000  | 1.359094000  | -0.000024000 |
| 7  | 2.523343000  | 0.174806000  | -0.000019000 |

E[MP2] = -700.2034296

ZPVE[MP2] = 0.099039

#### 12: phenyl isocyanate

0 1

|   |              |              |              |
|---|--------------|--------------|--------------|
| 6 | 0.091635000  | -0.280442000 | -0.000003000 |
| 6 | -0.300715000 | 1.056231000  | -0.000003000 |
| 6 | -0.862971000 | -1.290598000 | -0.000001000 |
| 6 | -1.649831000 | 1.373533000  | 0.000000000  |

|   |              |              |              |
|---|--------------|--------------|--------------|
| 6 | -2.210281000 | -0.961593000 | 0.000001000  |
| 6 | -2.609094000 | 0.368367000  | 0.000002000  |
| 1 | 0.449773000  | 1.835080000  | -0.000006000 |
| 1 | -0.536437000 | -2.320211000 | -0.000002000 |
| 1 | -1.951221000 | 2.411529000  | -0.000001000 |
| 1 | -2.949969000 | -1.749619000 | 0.000003000  |
| 1 | -3.659515000 | 0.621094000  | 0.000004000  |
| 6 | 2.509705000  | -0.093058000 | -0.000002000 |
| 8 | 3.590271000  | 0.337035000  | 0.000011000  |
| 7 | 1.444931000  | -0.646970000 | -0.000007000 |

E[M062X] = -399.6899612  
 ZPVE[M062X] = 0.1047234

0 1

|   |              |              |              |
|---|--------------|--------------|--------------|
| 6 | -0.093259000 | -0.283463000 | -0.000049000 |
| 6 | 0.298236000  | 1.057954000  | -0.000037000 |
| 6 | 0.867441000  | -1.294458000 | -0.000027000 |
| 6 | 1.651510000  | 1.379729000  | 0.000003000  |
| 6 | 2.218522000  | -0.962434000 | 0.000010000  |
| 6 | 2.615658000  | 0.373167000  | 0.000026000  |
| 1 | -0.454548000 | 1.835081000  | -0.000059000 |
| 1 | 0.542754000  | -2.325135000 | -0.000041000 |
| 1 | 1.950507000  | 2.418804000  | 0.000013000  |
| 1 | 2.959994000  | -1.749213000 | 0.000027000  |
| 1 | 3.665922000  | 0.628065000  | 0.000054000  |
| 6 | -2.509770000 | -0.084385000 | 0.000027000  |
| 8 | -3.609244000 | 0.335394000  | 0.000122000  |
| 7 | -1.440101000 | -0.658201000 | -0.000098000 |

E[MP2] = -397.440004  
 ZPVE[MP2] = 0.1039471

### 13: phenyl nitrene

0 3

|   |             |              |              |
|---|-------------|--------------|--------------|
| 6 | 0.000000000 | 0.000000000  | 1.056660000  |
| 6 | 0.000000000 | 1.224369000  | 0.336629000  |
| 6 | 0.000000000 | -1.224369000 | 0.336629000  |
| 6 | 0.000000000 | 1.210225000  | -1.040931000 |
| 6 | 0.000000000 | -1.210225000 | -1.040931000 |
| 6 | 0.000000000 | 0.000000000  | -1.735881000 |
| 1 | 0.000000000 | 2.150831000  | 0.892742000  |
| 1 | 0.000000000 | -2.150831000 | 0.892742000  |
| 1 | 0.000000000 | 2.143386000  | -1.586435000 |
| 1 | 0.000000000 | -2.143386000 | -1.586435000 |
| 1 | 0.000000000 | 0.000000000  | -2.816417000 |
| 7 | 0.000000000 | 0.000000000  | 2.390106000  |

E[M062X] = -286.2616536  
 ZPVE[M062X] = 0.09183

### CO-carbon monoxide

0 1

|   |             |             |              |
|---|-------------|-------------|--------------|
| 6 | 0.000000000 | 0.000000000 | -0.640469000 |
| 8 | 0.000000000 | 0.000000000 | 0.480352000  |

E[M062X] = -113.3127009  
 ZPVE[M062X] = 0.0051916
